# Supplementary material
Source: Royal Society of Chemistry journal article supplement (doi:10.1039/d6nr00449k)
Supplement: d6nr00449k2.pdf [file d6nr00449k2.pdf]

28 The surface morphology of the nanoparticles was examined by field-emission scanning electron  
29 microscopy (FE-SEM, TESCAN MIRA3) operated at an accelerating voltage of 5–10 kV. Prior to  
30 imaging, the samples were sputter-coated with a thin layer of gold using a Quorum SC7620 sputter  
31 coater under high-vacuum conditions.

32 Transmission electron microscopy (TEM) was employed to investigate the particle morphology  
33 and size distribution using an FEI Tecnai G2 20 S-Twin microscope. For TEM analysis, a dilute  
34 nanoparticle suspension (0.0001 wt %) was drop-cast onto a 200-mesh copper grid and allowed to  
35 dry under ambient conditions.

36 Ultraviolet-visible absorption spectra were recorded using a Shimadzu UV-2600  
37 spectrophotometer. Photoluminescence measurements were carried out on a Cary Eclipse  
38 fluorescence spectrophotometer (Agilent Technologies) equipped with a xenon lamp as the  
39 excitation source.

#### 40 **Section S3: Transformation of polysilazane to nanostructure**

41 Under solvothermal conditions at 200 °C, polysilazane undergoes a series of coupled reactions  
42 leading to the formation of Si-rich amorphous nanoparticles. The transformation is initiated by  
43 hydrolysis of the Si–N backbone ( $\text{Si–N} + \text{H}_2\text{O} \rightarrow \text{Si–OH} + \text{NH}_3$ ), accompanied by transamination  
44 reactions that facilitate the rearrangement and gradual removal of nitrogen-containing species.  
45 Concurrently, reactive Si–H groups undergo dehydrogenation and oxidation, generating additional  
46 silanol (Si–OH) functionalities. These silanol groups subsequently participate in condensation  
47 (polymerization/crosslinking) reactions ( $\text{Si–OH} + \text{Si–OH} \rightarrow \text{Si–O–Si} + \text{H}_2\text{O}$ ), resulting in the  
48 formation of a progressively interconnected siloxane network.<sup>1</sup> In parallel, the organic substituents  
49 attached to silicon undergo partial decomposition and rearrangement, contributing to the formation  
50 of Si–O–C linkages and disordered carbon domains within the structure. During this polymer-to-  
51 ceramic conversion, nitrogen is largely eliminated as volatile species (e.g.,  $\text{NH}_3$ ), leading to an  
52 oxygen-dominated chemical environment.<sup>2</sup> The overall process yields an amorphous Si–O–C–N  
53 hybrid network, structurally characterized by a dominant Si–O<sub>x</sub> framework with residual carbon  
54 and trace nitrogen, consistent with the spectroscopic observations.<sup>3</sup>

55

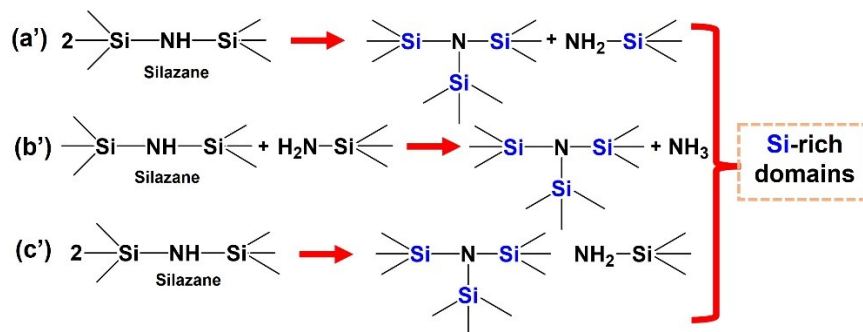

56

57

Figure 1S: Reaction pathways of polysilazanes

## 58 Section S4: Discussion on Defect-Mediated Photoluminescence

59 The photoluminescence observed in the present  $\text{SiO}_x$ -rich nanoparticles is attributed to defect- and  
 60 surface-state-mediated transitions, which are widely reported in amorphous silica and related  
 61 silicon-based systems. Previous studies have established that various intrinsic and extrinsic defect  
 62 centers within disordered Si–O networks can act as emissive states. For example, Saita et al.  
 63 demonstrated that fluorescence in silica-based nanoparticles originates from surface defect pairs  
 64 such as dioxasilyrane ( $=\text{Si}(\text{O}_2)$ ) and silylene (Si) centers, with hydrothermal treatment promoting  
 65 defect formation and enhancing emission efficiency.<sup>4</sup>

66 Similarly, Guleria et al. reported that photoluminescence in amorphous  $\text{SiO}_2$  nanoparticles arises  
 67 from multiple defect states, particularly oxygen-related defects, which act as emission centers and  
 68 can be tuned to produce emission across the blue-to-green spectral range.<sup>5,6</sup> The dominance of  
 69 oxygen-deficient or oxygen-related defect states has also been correlated with enhanced emission  
 70 intensity and sensing functionality in such systems. In polymer-derived systems, Menapace et al.  
 71 showed that thermal treatment of polysilazane leads to visible photoluminescence, which is  
 72 associated with structural rearrangements, dangling bonds, and the formation of carbon-related  
 73 species during the polymer-to-ceramic transition.<sup>7</sup> These findings highlight the role of structural  
 74 disorder and hybrid bonding environments (e.g., Si–O–C) in generating defect states capable of  
 75 radiative recombination.

76 More advanced defect-engineered silica systems reported by Chang et al. and Sun et al. further  
 77 demonstrate that both intrinsic defects (e.g., oxygen vacancies, non-bridging oxygen centers) and  
 78 extrinsic impurities (e.g., carbon- or nitrogen-related species) contribute to a distribution of  
 79 emissive states, resulting in complex optical behaviors including fluorescence and long-lived

80 phosphorescence.<sup>8,9</sup> Such studies emphasize that defect heterogeneity within amorphous silica  
 81 networks is a key factor governing their photophysical properties. Additionally, Trillot et al.  
 82 highlighted the presence of under-coordinated oxygen atoms in amorphous silica, which not only  
 83 influence transport properties but also act as active sites for metal ion coordination.<sup>10</sup> These defect  
 84 sites can interact strongly with ions such as Ag<sup>+</sup> through O–Ag bonding, supporting their dual role  
 85 in both optical emission and sensing behavior. Based on these established studies, the emission in  
 86 the present system is attributed to a combination of oxygen-related defect centers, Si–O–C  
 87 structural disorder, and residual defects generated during the solvothermal polymer-to-ceramic  
 88 transformation. The observed excitation-dependent emission further supports the presence of a  
 89 distribution of defect states rather than a single well-defined emissive center.

### 90 **Section S5: Fluorescence Quantum Yield**

91 As a reference, rhodamine 6G, which has a known quantum yield of .95, was used to calculate the  
 92 quantum yield (QY) of polysilazane-derived nanoparticles. Both nanoparticles and rhodamine 6G  
 93 solutions were made to keep their UV-Vis absorption peaks at or below 0.1. The fluorescence  
 94 intensities were calculated by integrating the regions under the PL emission spectra, and the  
 95 absorption and fluorescence spectra were taken at an excitation wavelength of 480 nm. The  
 96 following (**Equation 1S**) was used to get the quantum yield of nanoparticles. The absorbance of  
 97 both solutions was maintained below 0.1 to minimize inner filter effects. The quantum yield of the  
 98 polysilazane-derived nanoparticles was calculated to be approximately 26%.

99 The following (**Equation 1S**) was used to get the quantum yield of the particle.

$$100 \quad QY = QY_s \times \frac{I}{I_s} \times \frac{A_s}{A} \times \frac{\eta^2}{\eta_s^2} \times 100\% \quad ) \dots\dots\dots (\text{equation 1S})$$

101 *QY* is the quantum yield of the particle. The quantum yield of rhodamine 6G, the reference, is  
 102 denoted as *QY<sub>s</sub>*. The integral regions of the fluorescence peaks for the reference and the  
 103 nanoparticles are denoted by *I* and *I<sub>s</sub>*, respectively. The absorbance values for the nanoparticles  
 104 and the reference are *A* and *A<sub>s</sub>*, respectively. These  $\eta$  represent the solvents' refractive indices.

### 105 **Section S6: Dynamic light scattering (DLS) measurements**

106 Dynamic light scattering measurements were carried out to evaluate the hydrodynamic size of the  
 107 nanoparticles. The average particle size obtained from DLS is 100-105 nm, which is slightly higher

108 than the size observed from TEM (85-90 nm). This difference can be attributed to the  
109 hydrodynamic nature of DLS measurements, which include contributions from the solvation layer  
110 and surface-associated species, whereas TEM reflects the physical size of dried nanoparticles. The  
111 polydispersity index (PDI) of 0.3 indicates a moderately broad size distribution, and the intensity-  
112 weighted nature of DLS may also contribute to a slightly higher apparent size. Overall, the results  
113 confirm the formation of well-dispersed nanoparticles.

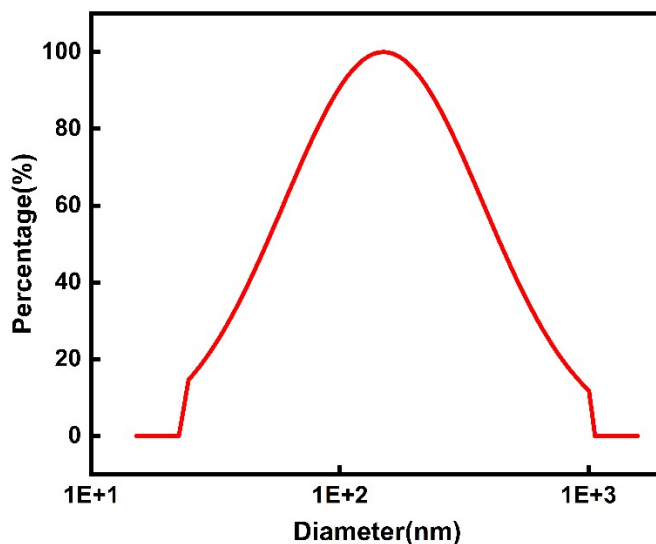

114

115

**Figure 2S:** DLS Study of the synthesized nanoparticles

116

### 117 Section S7: Comparison with other systems for the detection of Ag<sup>+</sup>

118 A comparison of the detection limit and linear sensing range of the present system with previously  
119 reported nanoparticle-based Ag<sup>+</sup> sensors. For instance, Luo et al. reported red-emissive carbon  
120 dots with a detection limit of 0.37  $\mu\text{M}$  and a linear range of 0–50  $\mu\text{M}$ , while Lu et al. developed  
121 dual-functional carbon dots exhibiting a lower detection limit of 0.05  $\mu\text{M}$ .<sup>11,12</sup> Similarly, Zhang et  
122 al. demonstrated ratiometric carbon quantum dots with a detection limit of 0.14  $\mu\text{M}$  and a wide  
123 linear range of 22–220  $\mu\text{M}$ . In comparison, Wang et al. reported N-doped carbon dots with a  
124 relatively higher detection limit of 4.7  $\mu\text{M}$  and a linear range of 30–210  $\mu\text{M}$ .<sup>13,14</sup> Additionally, Wu  
125 et al. developed bisbenzimidazole-based fluorescent sensors exhibiting rapid and selective Ag<sup>+</sup>  
126 detection based on complexation-induced quenching.<sup>15</sup>

127 These comparisons indicate that the polysilazane-derived nanoparticles in the present study exhibit  
 128 a competitive detection limit (0.55  $\mu\text{M}$ ) and a comparable sensing range relative to existing  
 129 fluorescent nanomaterial-based systems. Notably, unlike conventional carbon-dot or small-  
 130 molecule-based probes, the present system is derived from a single-source preceramic polymer via  
 131 a one-pot solvothermal route, resulting in an oxygen-rich Si–O–C–N hybrid network. The sensing  
 132 mechanism is governed by defect-rich siloxane environments rather than surface functional groups  
 133 or molecular fluorophores, offering enhanced structural robustness, long-term stability, and  
 134 potential compatibility with coating-based applications.

### 135 Section S8: Fluorescence lifetime study

136 The fluorescence decay profiles were fitted using a multi-exponential model, yielding three  
 137 lifetime components for the pristine nanoparticles ( $\tau_1 \approx 0.25$  ns,  $\tau_2 \approx 1.11$  ns, and  $\tau_3 \approx 2.93$  ns),  
 138 with the longest-lived component accounting for  $\sim 67\%$  of the total decay. Upon addition of  $\text{Ag}^+$   
 139 ions, all lifetime components increased ( $\tau_1 \approx 0.37$  ns,  $\tau_2 \approx 1.95$  ns, and  $\tau_3 \approx 4.74$  ns), along with a  
 140 marked shift in relative amplitudes toward the longer-lived components ( $\tau_2 \approx 48\%$  and  $\tau_3 \approx 47\%$ ).  
 141 Consequently, an overall increase in average fluorescence lifetime was observed despite the  
 142 simultaneous decrease in emission intensity. This unusual behavior suggests that  $\text{Ag}^+$  ions interact  
 143 with surface-associated defect states, altering the emissive-state population and suppressing faster  
 144 non-radiative decay channels. Together with Raman and XPS results confirming a defect-rich Si–  
 145 O–C network containing abundant oxygen-bearing surface functionalities, these findings support  
 146 a sensing mechanism dominated by defect-state modulation rather than simple dynamic collisional  
 147 quenching. The fluorescence decay profiles were fitted using a multi-exponential model:

$$148 \quad I(t) = B_1 e^{-t/\tau_1} + B_2 e^{-t/\tau_2} + B_3 e^{-t/\tau_3} \dots \dots \dots \text{(equation 2S)}$$

149 where  $\tau_i$  represent the lifetime components and  $B_i$  their relative contributions.

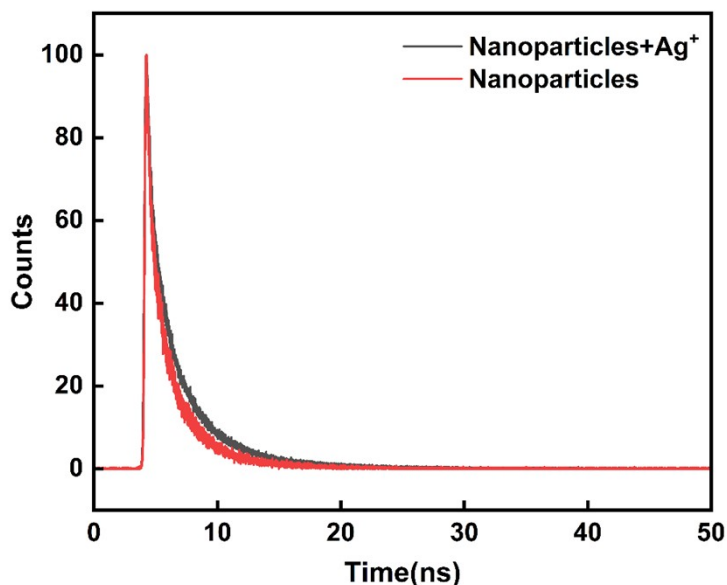

150

151 **Figure 3S:** Fluorescence lifetime study showing the slower decay of the excited states of the  
 152 nanoparticles in combination of the Ag<sup>+</sup> ions.

153

#### 154 **References:**

- 155 (1) D'Elia, R.; Dusserre, G.; Del Confetto, S.; Eberling-Fux, N.; Descamps, C.; Cutard, T. Effect of Dicumyl  
 156 Peroxide Concentration on the Polymerization Kinetics of a Polysilazane System. *Polym. Eng. Sci.* 2018, 58  
 157 (6), 859–869. <https://doi.org/10.1002/PEN.24638>;PAGE:STRING:ARTICLE/CHAPTER.
- 158 (2) Hwang, Y.; Ahn, K.; Kim, J. Silicon Carbonitride Covered SiC Composites for Enhanced Thermal  
 159 Conductivity and Electrical Insulation. *Appl. Therm. Eng.* 2014, 70 (1), 600–608.  
 160 <https://doi.org/10.1016/J.APPLTHERMALENG.2014.05.015>.
- 161 (3) Chatterjee, A.; Sen, S.; Ramakanth, D.; Singh, S.; Maji, P. K. Unravelling Polysilazanes: Synthesis, Structure-  
 162 Property Insights and Versatile Coating Applications. *Adv. Colloid Interface Sci.* 2025, 342, 103508.  
 163 <https://doi.org/10.1016/J.CIS.2025.103508>.
- 164 (4) Saita, S.; Kawasaki, H. Origin of the Fluorescence in Silica-Based Nanoparticles Synthesized from  
 165 Aminosilane Coupling Agents. *J. Lumin.* 2021, 232, 117849.  
 166 <https://doi.org/10.1016/J.JLUMIN.2020.117849>.
- 167 (5) Guleria, A.; Chavan, A. P.; Tomy, A.; Baby, C. M.; Neogy, S.; Debnath, A. K.; Adhikari, S. Defect Originated  
 168 Photoluminescence Tuning of Silica Nanoparticles Prepared by Electron Beam Irradiation and Their  
 169 Applications. *Ceram. Int.* 2021, 47 (2), 2649–2655. <https://doi.org/10.1016/J.CERAMINT.2020.09.113>.
- 170 (6) Guleria, A.; Chiplunkar, S. S.; Hari, A.; Das, B.; Rath, M. C. Defect-Rich Silica Nanoparticles: Selective  
 171 Enhancement of Blue Emission, Cr (VI) Sensing and Inherent Antioxidant Functionality. *Colloids Surf. A*  
 172 *Physicochem. Eng. Asp.* 2025, 725, 137599. <https://doi.org/10.1016/J.COLSURFA.2025.137599>.

- 173 (7) Menapace, I.; Mera, G.; Riedel, R.; Erdem, E.; Eichel, R. A.; Pauletti, A.; Appleby, G. A. Luminescence of  
174 Heat-Treated Silicon-Based Polymers: Promising Materials for LED Applications. *Journal of Materials*  
175 *Science* 2008 43:17 2008, 43 (17), 5790–5796. <https://doi.org/10.1007/S10853-008-2882-9>.
- 176 (8) Chang, H.; Park, Y.; Kim, K.; Han, C.; Yoon, Y.; Yoo, W.; Yoo, J.; Lee, D.; Han, H.; Kim, K.; Joo, J.; Kwon,  
177 W. Room-Temperature Phosphorescence of Defect-Engineered Silica Nanoparticles for High-Contrast  
178 Afterglow Bioimaging. *Chemical Engineering Journal* 2024, 493, 152529.  
179 <https://doi.org/10.1016/J.CEJ.2024.152529>.
- 180 (9) Sun, Y.; Shao, X.; Sui, L.; Yang, Y.; Zhong, Y.; Yang, S.; Liu, J. Multi-Defects within Silica Inducing  
181 Coexistence of Thermal Activated Delayed Fluorescence and Room Temperature Phosphorescence. *Chemical*  
182 *Engineering Journal* 2025, 519, 164772. <https://doi.org/10.1016/J.CEJ.2025.164772>.
- 183 (10) Trillot, S.; Tarrat, N.; Combe, N.; Benzo, P.; Bonafos, C.; Benoit, M. Evidence and Origin of Anomalous  
184 Diffusion of Ag<sup>+</sup> Ion in Amorphous Silica: A Molecular Dynamics Study with Neural Network Interatomic  
185 Potentials. *Journal of Chemical Physics* 2025, 162 (10). <https://doi.org/10.1063/5.0251120/3339199>.
- 186 (11) Luo, Y.; Cui, C.; Zhang, X.; Jiang, Y.; Xiang, Z.; Ji, C.; Peng, Z. Carbon Dots-Based Fluorescence Assay for  
187 the Facile and Reliable Detection of Ag<sup>+</sup> in Natural Water and Serum Samples. *Molecules* 2023, 28 (4), 1566.  
188 <https://doi.org/10.3390/MOLECULES28041566/S1>.
- 189 (12) Lu, S.; Li, Z.; Fu, X.; Xie, Z.; Zheng, M. Carbon Dots-Based Fluorescence and UV–Vis Absorption Dual-  
190 Modal Sensors for Ag<sup>+</sup> and l-Cysteine Detection. *Dyes and Pigments* 2021, 187, 109126.  
191 <https://doi.org/10.1016/J.DYEPIG.2020.109126>.
- 192 (13) Zhang, L.; Liao, D.; Fan, X.; Luo, B.; Jiang, L.; Qin, Y.; Liao, L.; Wang, Y.; Feng, L.; Li, Z.; Qin, A. Dual  
193 Photoluminescence Emission Chiral Carbon Quantum Dots for Ratiometric and Visual Fluorescent Ag<sup>+</sup>  
194 Sensing. *ACS Appl. Nano Mater.* 2025, 8 (4), 1944–1955. <https://doi.org/10.1021/ACSANM.4C06492>.
- 195 (14) Wang, Y. Te; Wu, R. R.; Zhang, Y. Y.; Cheng, S. R.; Zhang, Y. High Quantum Yield Nitrogen Doped Carbon  
196 Dots for Ag<sup>+</sup> Sensing and Bioimaging. *J. Mol. Struct.* 2023, 1283, 135212.  
197 <https://doi.org/10.1016/J.MOLSTRUC.2023.135212>.
- 198 (15) Wu, Y. C.; Jiang, K.; Luo, S. H.; Cao, L.; Wu, H. Q.; Wang, Z. Y. Novel Dual-Functional Fluorescent Sensors  
199 Based on Bis(5,6-Dimethylbenzimidazole) Derivatives for Distinguishing of Ag<sup>+</sup> and Fe<sup>3+</sup> in Semi-Aqueous  
200 Medium. *Spectrochim. Acta A Mol. Biomol. Spectrosc.* 2019, 206, 632–641.  
201 <https://doi.org/10.1016/J.SAA.2018.05.069>.

202

203
